# Supplementary material
Source: Royal Society of Chemistry journal article supplement (doi:10.1039/d5fo05118e)
Supplement: d5fo05118e1.pdf [file d5fo05118e1.pdf]

1  
2  
3  
4  
5  
6  
7  
8  
9  
10  
11  
12  
13  
14  
15  
16  
17  
18

## Supporting Information

### **Theabrownin Derived from Pu-erh Tea Enhances Intestinal Barrier Integrity and Microbiota Balance via the ST6GalNAc6–STn–MUC2**

#### **Axis in Inflammation**

Keqin Xie<sup>1‡</sup>, Yumei Qin<sup>1,2‡</sup>, Lulu Li<sup>1</sup>, Qing Zhu<sup>1</sup>, Tong Ye<sup>1</sup>, Wenzhu Wang<sup>1,2</sup>,  
Jianzhong Han<sup>1\*</sup>, Yanpei Gu<sup>1\*</sup>

<sup>1</sup>*School of Food Science and Biotechnology, Zhejiang Gongshang University, Hangzhou 310018, China.*

<sup>2</sup>*Zhejiang-UK Joint Research Laboratory of Food Sensory Science, School of Food Science and Biotechnology, Zhejiang Gongshang University, Hangzhou 310018, China*

‡ These authors equally contribute to this article.

\*To whom correspondence should be addressed.

Email: yanpeigu@zjgsu.edu.cn (Yanpei Gu), hanjz99@zjgus.edu.cn (Jianzhong Han)

## 19 **1. SUPPLEMENTARY METHODS**

### 20 1.1 LC-MS analysis of TB.

21 UPLC parameter: Agilent 1290 UPLC (Agilent, California, USA) with waters  
22 BEH C18 column (1.7  $\mu\text{m}$ , 2.1  $\times$  100 mm) was used. TB were diluted with distilled  
23 water and filtered through a 0.45  $\mu\text{m}$  syringe filter. Mobile phases were 0.1% formic  
24 acid-water (A) and acetonitrile (B). The linear gradient programs were set as 0-8 min,  
25 95-5% A; 8-14 min, 5-95% A. Sample injection volume of 5  $\mu\text{L}$ ; Flow rate of 0.3  
26 mL/min and column oven temperature of 40  $^{\circ}\text{C}$ .

27 Mass spectrometry: Agilent QTOF 6550 (Agilent, California, USA). MS  
28 conditions of positive ion mode: source voltage of -3.2 kV, sheath gas temperature of  
29 350  $^{\circ}\text{C}$ , and sheath gas flow of 12L/min. The primary mass spectrometry scan range is  
30 50-1000 m/z. Traditional Chinese medicine database (TCM-databse.cdb) is used for  
31 ingredient matching.

### 32 1.2 Justification of dosage selection.

33 According to the US FDA's guidelines for oral dose conversion between human  
34 and mouse, the human equivalent dose is calculated using Equation 1, where the  
35 conversion factor (W) is 0.11. The human equivalent dose of TB is calculated to be 6.6  
36 g/60kg.

$$37 \quad \textit{human oral dose (mg/kg)} = W \times \textit{mouse oral dose (mg/kg)} \quad (1)$$

38

## 39 **2. SUPPLEMENTARY FIGURES**

40 **Table S1** Phenolic compounds identified in TB by UPLC-MS.

41 **Figure S1.** Inhibition of ST6GalNAc6 abrogated the protective effect of TB against  
42 colitis in mice. Daily variations in body weight (A) and DAI score after inhibitor  
43 treatment (B) (n=10); Representative images (C) and length statistical analysis of colon  
44 (D) (n=10); Representative microscope images of colon section beneath H&E staining  
45 (E) and AB-PAS (F) (n=6). Scale bars: 100  $\mu\text{m}$  (F, upper panel), 20  $\mu\text{m}$  (F, lower panel).  
46 Each data point represents the average of per treatment and time point. Values that do  
47 not share a common letter are significantly different at  $p < 0.05$

48 **Figure S2.** Inhibition of ST6GalNAc6 attenuated the suppressive effect of TB on STn  
49 expression. Immunofluorescence results of STn (A) (n=6); Relative expression of  
50 ST6GalNAc 6 (B) (n=6). Scale bars: 100  $\mu\text{m}$  (A, upper panel), 20  $\mu\text{m}$  (A, zoom). Values  
51 not sharing a common letter are significantly different at  $p < 0.05$ .

52

**Table S1** Phenolic compounds identified in TB by UPLC-MS.

| Peak No. | Rt (min) | Mass   | Formula                                                     | Diff (ppm) | Identification                                                                                       | Relative Content |
|----------|----------|--------|-------------------------------------------------------------|------------|------------------------------------------------------------------------------------------------------|------------------|
| 1        | 0.54     | 180.07 | C <sub>7</sub> H <sub>8</sub> N <sub>4</sub> O <sub>2</sub> | 3.44       | Theobromine                                                                                          | 522.15           |
|          | 0.57     | 88.016 | C <sub>3</sub> H <sub>4</sub> O <sub>3</sub>                | -0.92      | Pyroracemic acid                                                                                     | 27.52            |
|          | 0.59     | 174.05 | C <sub>7</sub> H <sub>10</sub> O <sub>5</sub>               | -0.56      | Shikimic acid                                                                                        | 121.57           |
|          | 2.15     | 170.02 | C <sub>7</sub> H <sub>6</sub> O <sub>5</sub>                | -4.52      | Gallic acid                                                                                          | 43.00            |
| 2        | 2.25     | 274.08 | C <sub>15</sub> H <sub>14</sub> O <sub>5</sub>              | -0.4       | (-)-Epiafzelechin                                                                                    | 584.88           |
| 3        | 2.35     | 290.08 | C <sub>15</sub> H <sub>14</sub> O <sub>6</sub>              | 3.84       | (-)-Epicatechin                                                                                      | 3214.53          |
| 4        | 2.39     | 236.06 | C <sub>12</sub> H <sub>12</sub> O <sub>5</sub>              | -0.72      | 2-Methyl-5-carboxymethyl-7-hydroxychromanone                                                         | 7.10             |
| 5        | 3.20     | 154.02 | C <sub>7</sub> H <sub>6</sub> O <sub>4</sub>                | -2.55      | 3,5-Dihydroxybenzoic acid                                                                            | 920.76           |
| 6        | 3.24     | 460.15 | C <sub>20</sub> H <sub>28</sub> O <sub>12</sub>             | 0.32       | Paeonolide                                                                                           | 132.31           |
| 7        | 3.32     | 786.19 | C <sub>37</sub> H <sub>38</sub> O <sub>19</sub>             | -1.72      | Isorhamnetin 3-O-beta-(6''-E-p-coumaroylglucopyranoside)-7-O-beta-glucopyranoside                    | 19.02            |
| 8        | 3.67     | 328.09 | C <sub>18</sub> H <sub>16</sub> O <sub>6</sub>              | 1.55       | 1,3,5,6-Tetrahydroxy-4-phenylxanthone                                                                | 7.06             |
|          | 3.72     | 122.04 | C <sub>7</sub> H <sub>6</sub> O <sub>2</sub>                | -3.86      | Benzoic acid                                                                                         | 12.55            |
| 9        | 3.83     | 595.16 | C <sub>27</sub> H <sub>31</sub> O <sub>15</sub>             | 2.28       | Pelargonidin-3,5-diglucoside                                                                         | 70.37            |
| 10       | 3.98     | 180.04 | C <sub>9</sub> H <sub>8</sub> O <sub>4</sub>                | -1.3       | Caffeic acid                                                                                         | 248.77           |
| 11       | 4.19     | 594.15 | C <sub>27</sub> H <sub>30</sub> O <sub>15</sub>             | -0.13      | 6,8-Bis(C-glucosyl)-apigenin                                                                         | 3116.64          |
| 12       | 4.34     | 226.12 | C <sub>12</sub> H <sub>18</sub> O <sub>4</sub>              | -1.13      | 2-(1-Ethoxy-2-hydroxy)propyl-4-methoxyphenol                                                         | 151.34           |
| 13       | 4.48     | 564.14 | C <sub>26</sub> H <sub>28</sub> O <sub>14</sub>             | -0.29      | 5,7,4'-Trihydroxy-6-C-arabinoside-8-C-glucoside flavone                                              | 3535.38          |
| 14       | 4.57     | 433.11 | C <sub>21</sub> H <sub>21</sub> O <sub>10</sub>             | -1.05      | Pelargonidin-3-galactoside                                                                           | 152.79           |
| 15       | 4.57     | 434.11 | C <sub>21</sub> H <sub>22</sub> O <sub>10</sub>             | -3.19      | 2-O-Caffeoyl arbutin                                                                                 | 192.70           |
| 16       | 4.59     | 264.09 | C <sub>14</sub> H <sub>16</sub> O <sub>5</sub>              | -0.85      | 1'-Acetoxyeugenol acetate                                                                            | 188.99           |
| 17       | 4.64     | 220.07 | C <sub>12</sub> H <sub>12</sub> O <sub>4</sub>              | -1.09      | Eugenitin                                                                                            | 119.59           |
| 18       | 4.74     | 432.10 | C <sub>21</sub> H <sub>20</sub> O <sub>10</sub>             | -0.24      | 3,4',5,7-Tetrahydroxyflavone-3-L-rhamnoside                                                          | 8640.90          |
| 19       | 4.85     | 360.12 | C <sub>19</sub> H <sub>20</sub> O <sub>7</sub>              | 0.39       | 3,4-Dihydroxy-6,7,3',4'-tetramethoxyflavonol                                                         | 76.84            |
| 20       | 4.88     | 772.20 | C <sub>33</sub> H <sub>40</sub> O <sub>2</sub>              | -0.62      | Kaempferol-3-diglucose-7-glucoside                                                                   | 406.20           |
| 21       | 5.03     | 610.15 | C <sub>27</sub> H <sub>30</sub> O <sub>16</sub>             | 0.67       | Equisetrin                                                                                           | 111.43           |
| 22       | 5.20     | 548.15 | C <sub>26</sub> H <sub>28</sub> O <sub>13</sub>             | 0.17       | Apigenin bioside                                                                                     | 230.87           |
| 23       | 5.20     | 756.21 | C <sub>33</sub> H <sub>40</sub> O <sub>20</sub>             | 0.48       | Quercetin-3-O-[alpha-rhamnopyranosyl-(1-->4)-alpha-rhamnopyranosyl-(1-->6)-beta-glucopyranoside]     | 4533.27          |
| 24       | 5.33     | 740.21 | C <sub>33</sub> H <sub>40</sub> O <sub>19</sub>             | -0.05      | 1-[(beta-D-Glucopyranosyl-(1-->3)-O-beta-D-glucopyranosyl-(1-->6)-O-beta-D-glucopyranosyl)oxy]-8-hyd | 465.03           |
| 25       | 5.36     | 448.10 | C <sub>21</sub> H <sub>20</sub> O <sub>11</sub>             | -0.65      | 3,3',4',5,7-Pentahydroxyvone-3-L-rhamnoside                                                          | 494.59           |
| 26       | 5.85     | 252.09 | C <sub>13</sub> H <sub>16</sub> O <sub>5</sub>              | -3.77      | Eugenone                                                                                             | 152.32           |
| 27       | 5.88     | 222.08 | C <sub>12</sub> H <sub>14</sub> O <sub>4</sub>              | -5.18      | 2,3-Dihydro-5,7-dihydroxy-2,6,8-trimethyl-4H-1-benzopyran-4-one                                      | 156.45           |
| 28       | 5.91     | 271.06 | C <sub>15</sub> H <sub>11</sub> O <sub>5</sub>              | -0.26      | Pelargonidin                                                                                         | 291.19           |
| 29       | 6.25     | 312.12 | C <sub>15</sub> H <sub>20</sub> O <sub>7</sub>              | 3.31       | 3,4-Dihydroxy-allylbenzene-4-O-beta-D-glucopyranoside                                                | 1583.75          |
| 30       | 6.71     | 194.09 | C <sub>11</sub> H <sub>14</sub> O <sub>3</sub>              | -1.47      | 2-Methoxy-4-(3-methoxy-1-propenyl)-phenol                                                            | 1498.76          |
| 31       | 7.22     | 294.18 | C <sub>17</sub> H <sub>26</sub> O <sub>4</sub>              | 0.35       | Embelin                                                                                              | 2004.53          |

54 **Table S1 (continued)**

|    |       |        |                                                 |       |                                                                              |        |
|----|-------|--------|-------------------------------------------------|-------|------------------------------------------------------------------------------|--------|
| 32 | 9.79  | 772.18 | C <sub>36</sub> H <sub>36</sub> O <sub>19</sub> | -2.12 | Quercetin-3-O-beta-(6"-E-p-coumaroylglucopyranoside)-7-O-beta-gucopyranoside | 56.31  |
| 33 | 10.48 | 224.10 | C <sub>12</sub> H <sub>16</sub> O <sub>4</sub>  | -3.85 | (Z)-4,5-Dihydro-6,7-cis-dihydroxy-3-butylidene phthalide                     | 506.36 |
| 34 | 10.67 | 184.03 | C <sub>8</sub> H <sub>8</sub> O <sub>5</sub>    | -6.02 | 3-Methoxygallic acid                                                         | 145.69 |
| 35 | 13.57 | 268.16 | C <sub>15</sub> H <sub>24</sub> O <sub>4</sub>  | 2.44  | 1-(4-Hydroxy-3-methoxyphenyl)-3,5-octane-diol                                | 7.71   |

55

56 **Figure S1**

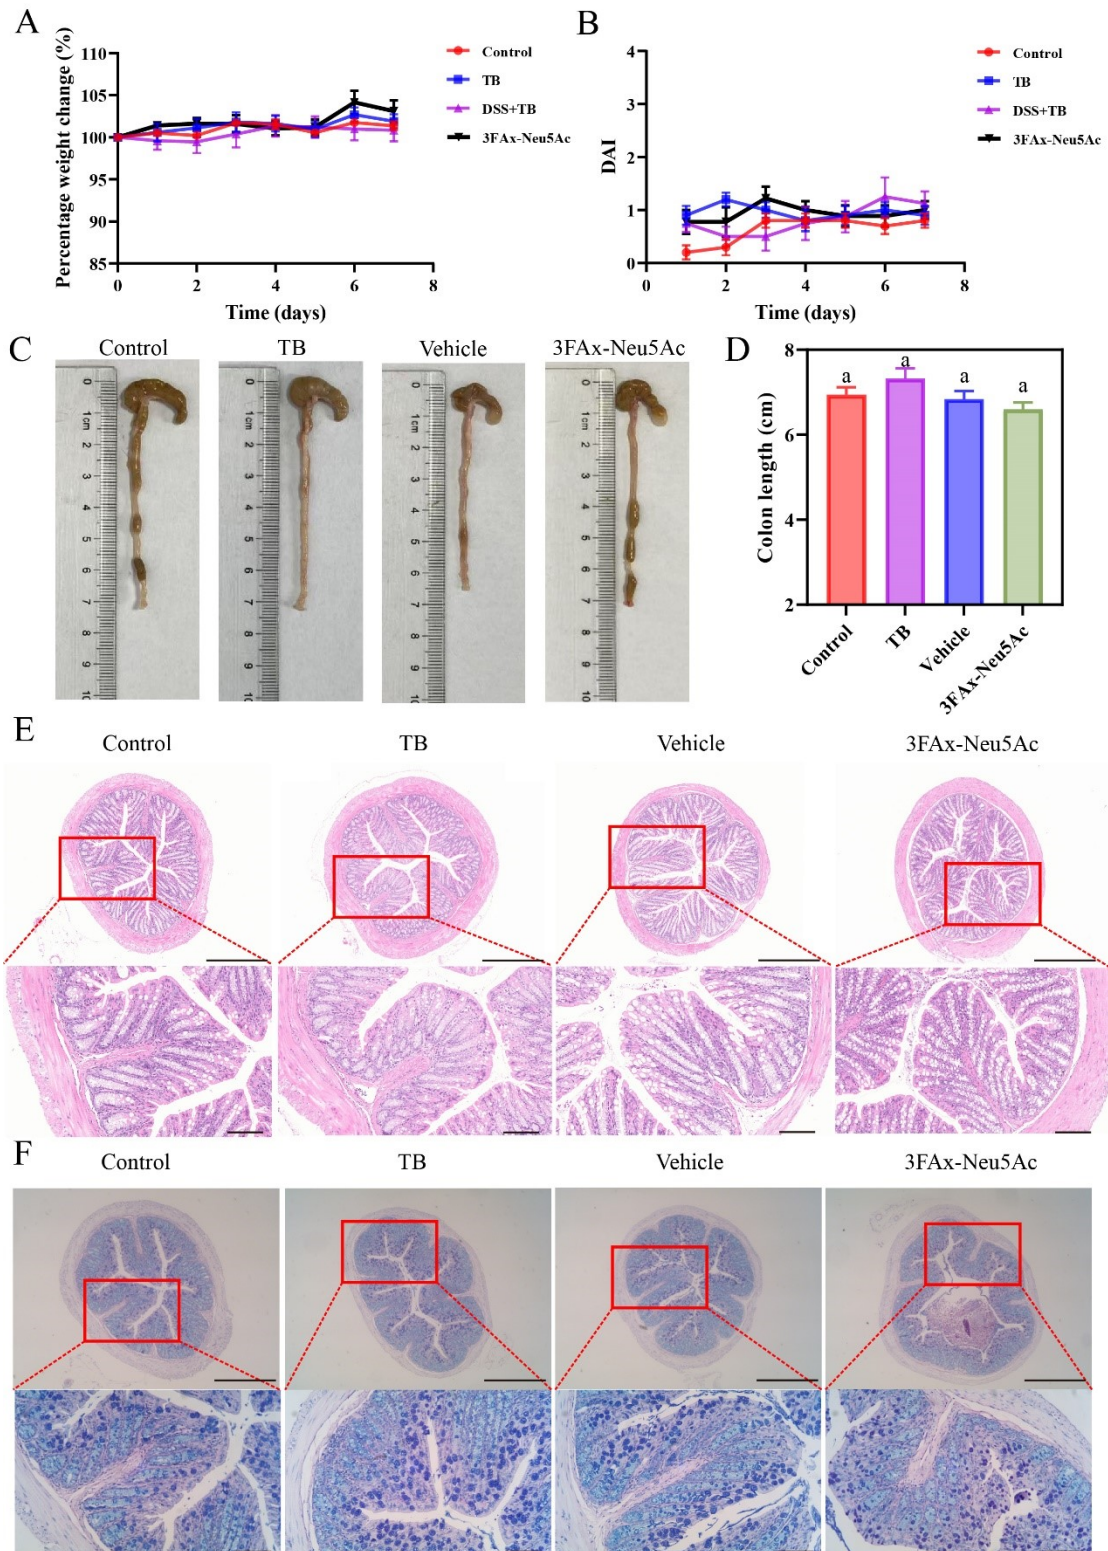

57

58

59

60 **Figure S2**

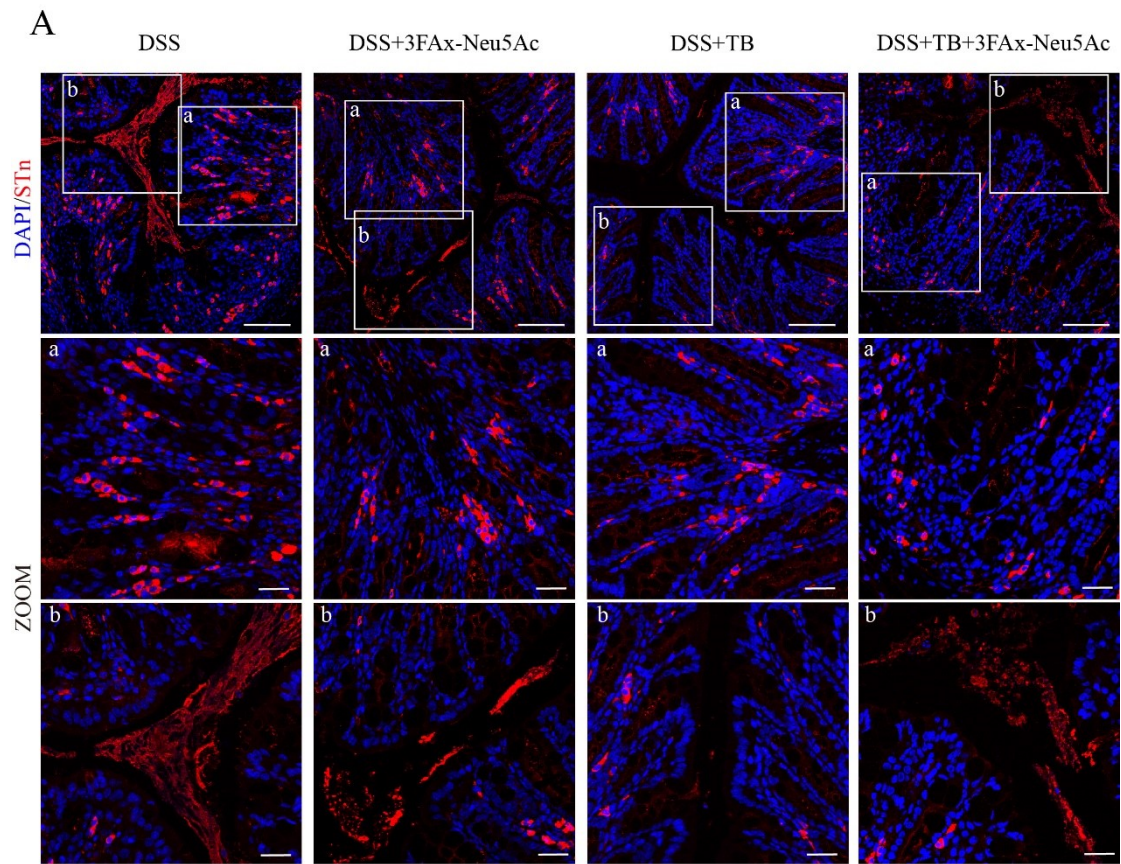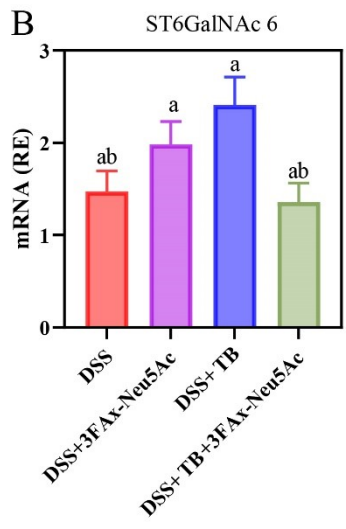

61

62

63
